# Supplementary material
Source: PubMed Central journal article supplement (PMC7434683)
Supplement: plantbiotechnology-37-2-20.0220a-s001.pdf [file plantbiotechnology-37-2-20.0220a-s001.pdf]

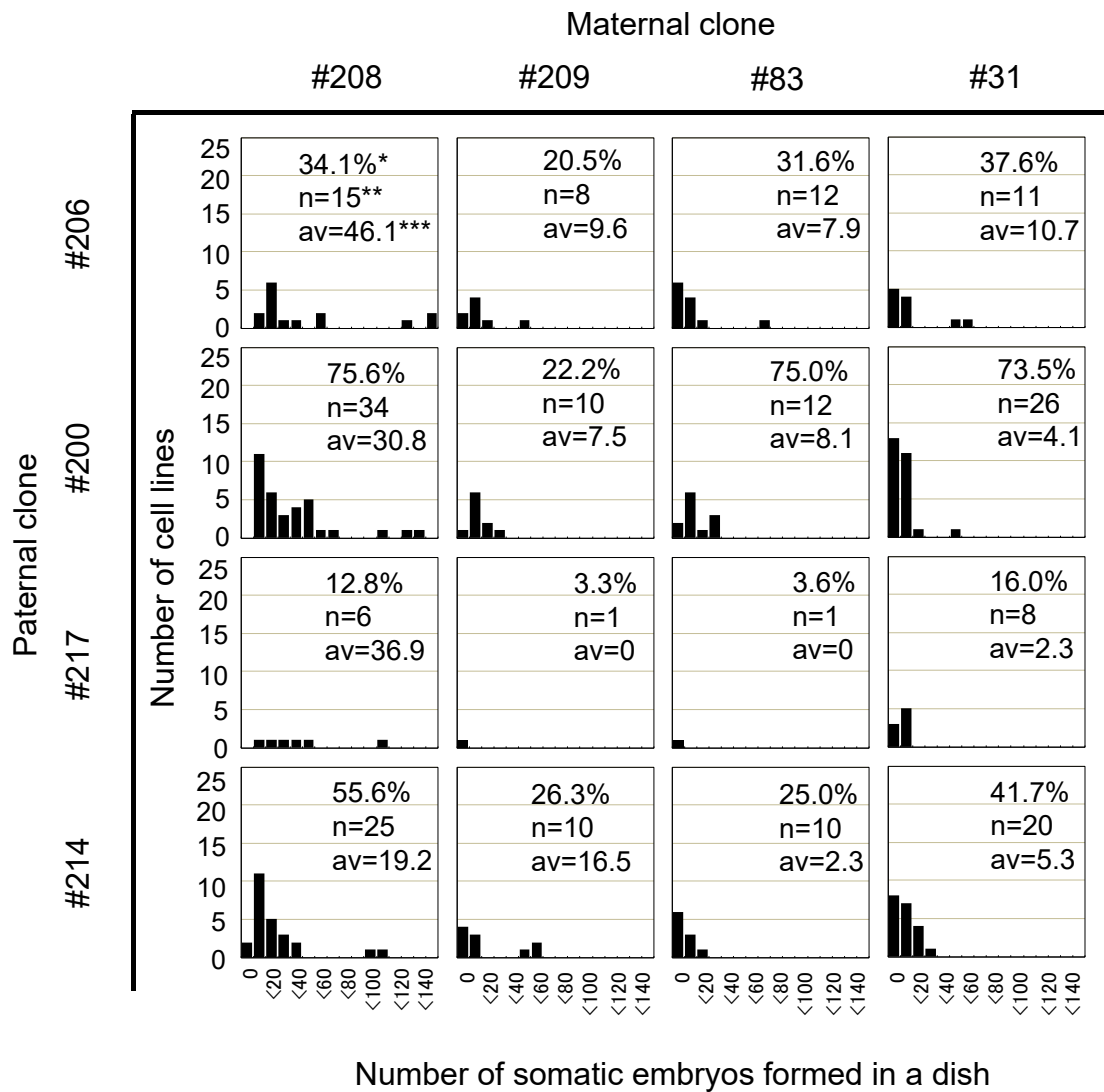

Supplementary Figure S1. Frequency distributions of the number of somatic embryos formed in each cell line induced from 16 seed families of *Cryptomeria japonica* 2<sup>nd</sup> generation plus trees (experiment conducted in 2016). \*Percentage of embryogenic tissue induction. \*\*Number of embryogenic tissue lines cultured in embryo induction medium. \*\*\*Mean number of somatic embryos in each seed family.

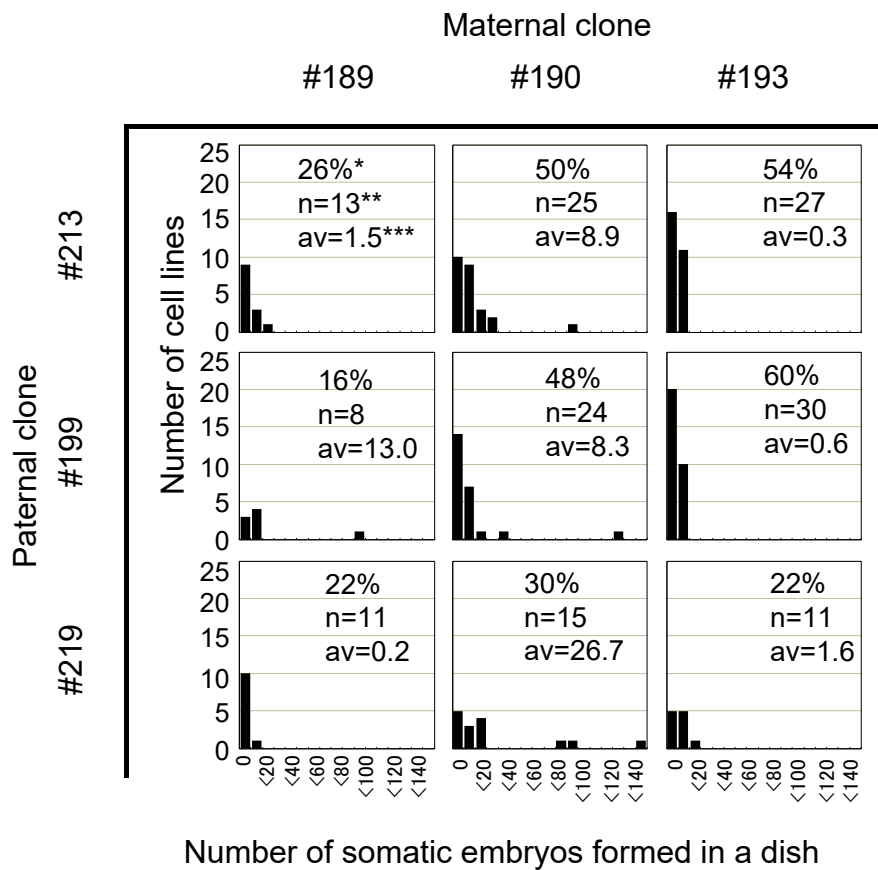

Supplementary Figure S2. Frequency distributions of the number of somatic embryos formed in each cell line induced from 9 seed families of *Cryptomeria japonica* 2<sup>nd</sup> generation plus trees (experiment conducted in 2017). \*Percentage of embryogenic tissue induction. \*\*Number of embryogenic tissue lines cultured in embryo induction medium. \*\*\*Mean number of somatic embryos in each seed family.

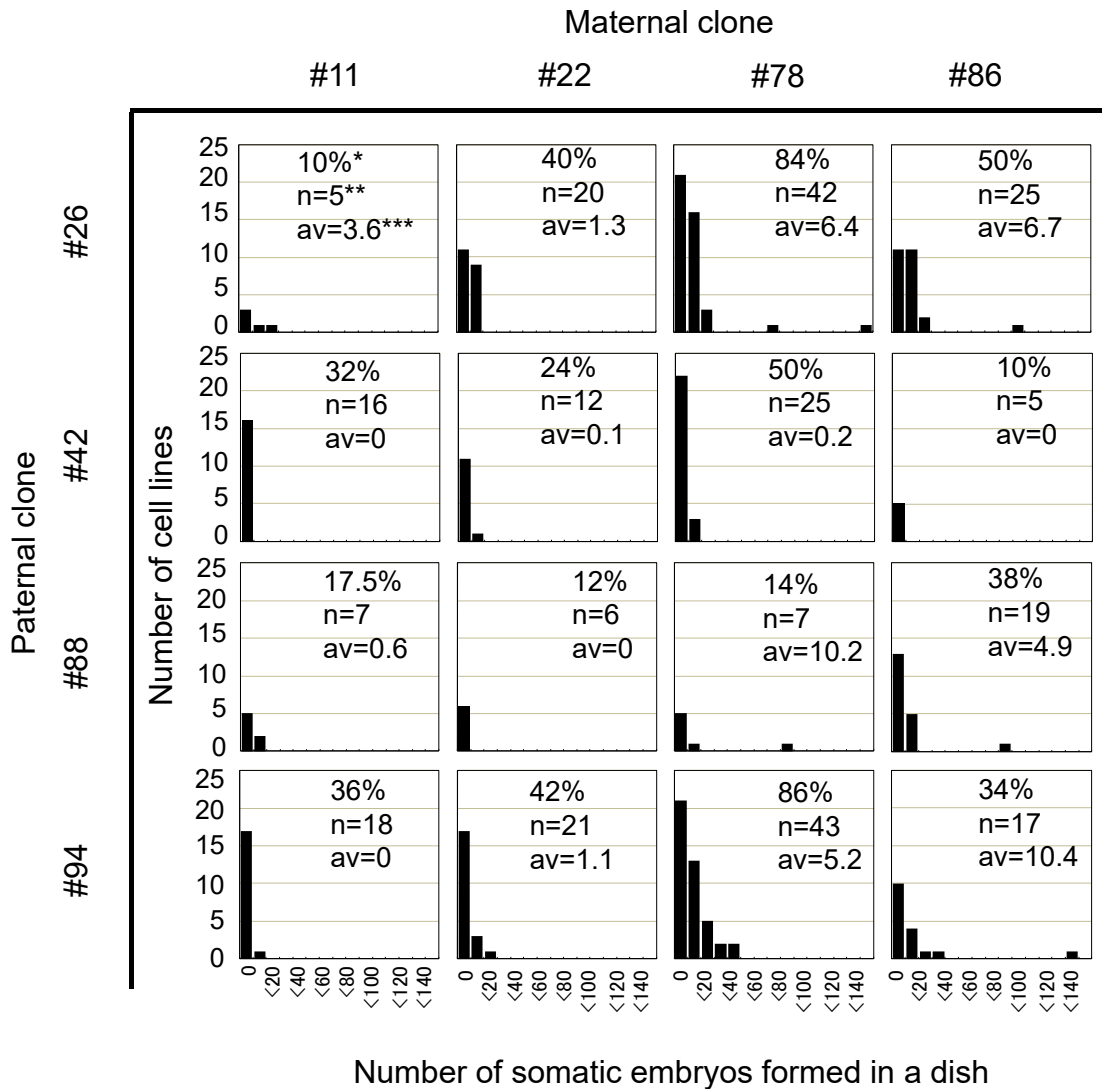

Supplementary Figure S3. Frequency distributions of the number of somatic embryos formed in each cell line induced from 16 seed families of *Cryptomeria japonica* 2<sup>nd</sup> generation plus trees (experiment conducted in 2018). \*Percentage of embryogenic tissue induction. \*\*Number of embryogenic tissue lines cultured in embryo induction medium. \*\*\*Mean number of somatic embryos in each seed family.
